# Supplementary material for: Cationic quaternary ammonium salt-catalyzed LED-induced living radical polymerization within situhalogen exchange
Source: Royal Society of Chemistry journal article supplement (doi:10.1039/d0py00474j), 2020-01-01
Supplement: d0py00474j1.pdf [file d0py00474j1.pdf]

## Cationic quaternary ammonium salts catalyzed LED-induced living radical polymerization with in situ halogen exchange

Feifei Li, Wanting Yang, Mengmeng Li, Lin Zhou and Lin Lei\*

Key Laboratory of Synthetic and Natural Functional Molecular Chemistry of the Ministry of Education College of Chemistry and Materials Science, Northwest University, Xi'an, 710127, P. R. China.

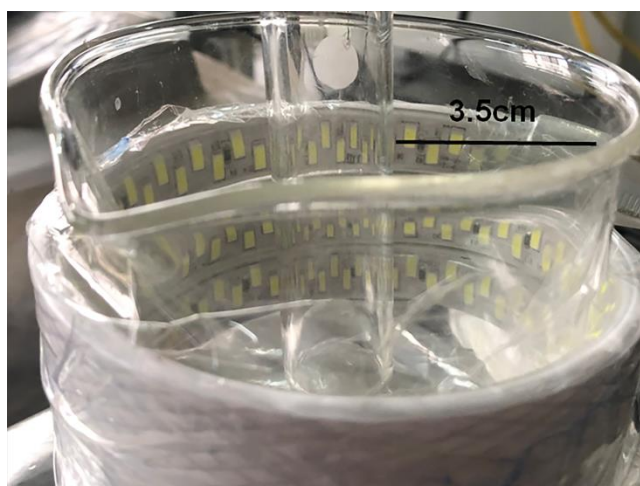

Figure S1. The picture of white LED light (380 -780 nm, 13 W/m, 1.5 mW/cm<sup>2</sup>): actual light intensity (at the position of the reaction solution) experimentally measured by a luminometer.

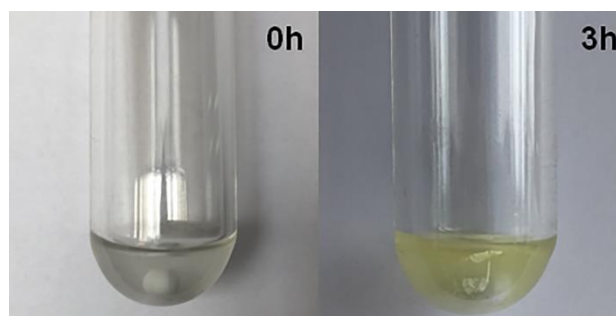

Figure S2. The state changes in the procedure of reaction. Polymerization condition was in figure 2.

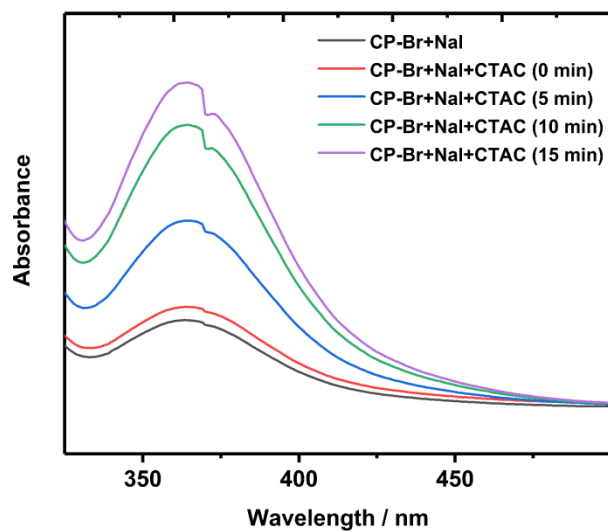

Figure S3. UV-vis spectra of CP-Br (0.02 mmol) with NaI (0.021 mmol) (black line), and then CTAC (0.02 mmol) was added to this solution (red line), then irradiated with a white LED for 5 min (blue line), 10 min (green line), and 15 min (purple line). The solvent was MMA in all cases.

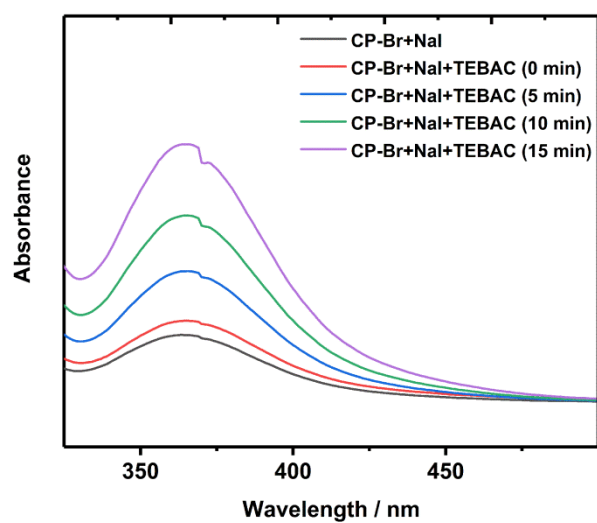

Figure S4. UV-vis spectra of CP-Br (0.02 mmol) with NaI (0.021 mmol) (black line), and then TEBAC (0.02 mmol) was added to this solution (red line), then irradiated with a white LED for 5 min (blue line), 10 min (green line), and 15 min (purple line). The solvent was MMA in all cases.
